# Supplementary material for: Different Effects of Albumin and Hydroxyethyl Starch on Low Molecular-Weight Solute Permeation through Sodium Hyaluronic Acid Solution
Source: MDPI journal article supplement (doi:10.3390/polym13040514), 2021-02-09
Supplement: s1 [file s1]

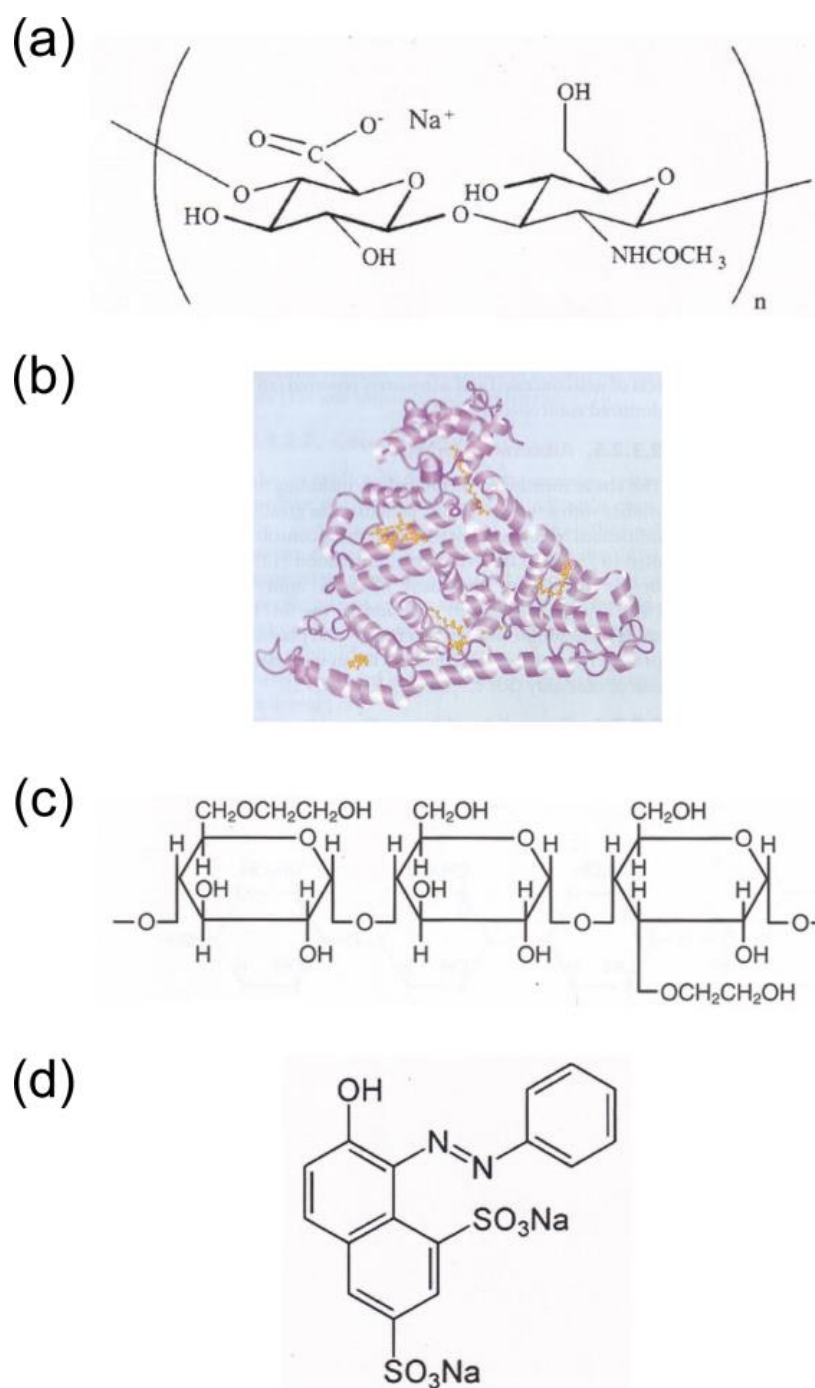

**Figure S1.** Chemical structures of (a) sodium hyaluronic acid, (b) albumin, (c) hydroxyethyl starch, and (d) Orange G.

0 h

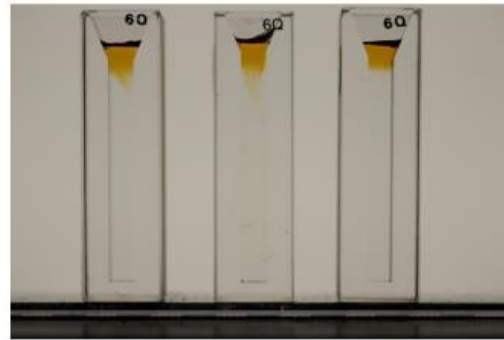

PBS ALB HES

10 h

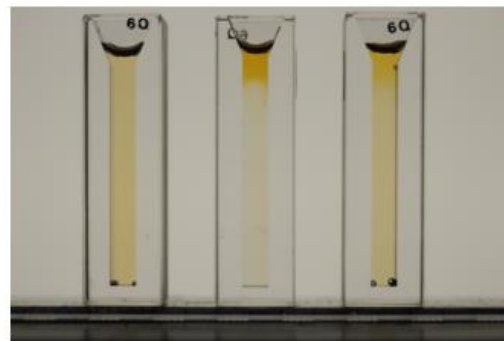

PBS ALB HES

20 h

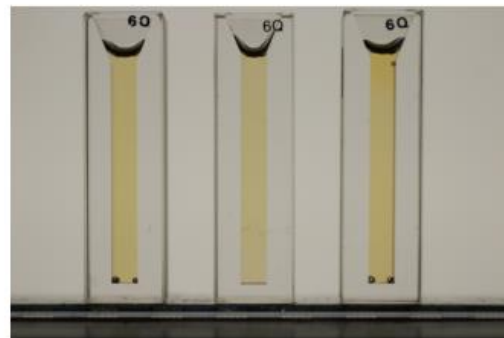

PBS ALB HES

**Figure S2.** Direct visualization of Orange G permeation into 0.2% sodium hyaluronic acid in phosphate buffered saline (PBS), 1% albumin solution (ALB), and hydroxyethyl starch solution (HES) in ultraviolet cuvette at 37°C.
